# Supplementary material
Source: PubMed Central journal article supplement (PMC7749361)
Supplement: pnas.2016234117.sapp.pdf [file pnas.2016234117.sapp.pdf]

SI Appendix:

The Fast Track Intervention's Impact on  
Behaviors of Despair in Adolescence and Young Adulthood

Jennifer W. Godwin (Duke University)

And

Conduct Problems Prevention Research Group<sup>1</sup>

Corresponding Author: Jennifer W. Godwin ([jgodwin@duke.edu](mailto:jgodwin@duke.edu))

Tables S1-S5

Table S1: Complete Results for FIML Logistic Regressions Estimating Probability of Behaviors of Despair (N=891)

|                                                                   | Any Behavior of<br>Despair<br>(Age 15-20, 25) | Suicidal Ideation<br>(Age 15-20, 25) | Suicide<br>Attempt/Self-Harm<br>(Age 15-20, 25) | Weekly Hazardous<br>Drinking<br>(Age 15-20, 25) | Weekly Opioid Use<br>(Age 19, 20, 25) |
|-------------------------------------------------------------------|-----------------------------------------------|--------------------------------------|-------------------------------------------------|-------------------------------------------------|---------------------------------------|
|                                                                   | <b>OR (95% CI)</b>                            | <b>OR (95% CI)</b>                   | <b>OR (95% CI)</b>                              | <b>OR (95% CI)</b>                              | <b>OR (95% CI)</b>                    |
| Intervention                                                      | 0.59 (0.41, 0.83)                             | 0.55 (0.37, 0.83)                    | 0.69 (0.42, 1.16)                               | 0.55 (0.33, 0.92)                               | 0.39 (0.15, 0.98)                     |
| Male                                                              | 0.94 (0.65, 1.36)                             | 0.60 (0.40, 0.92)                    | 0.51 (0.29, 0.91)                               | 2.88 (1.50, 5.55)                               | 1.59 (0.44, 5.71)                     |
| Cohort 1                                                          | 1.30 (0.85, 1.98)                             | 1.45 (0.85, 2.48)                    | 1.95 (0.95, 4.03)                               | 1.33 (0.71, 2.47)                               | 1.35 (0.33, 5.55)                     |
| Cohort 2                                                          | 1.23 (0.81, 1.86)                             | 1.64 (0.98, 2.75)                    | 2.97 (1.52, 5.82)                               | 0.58 (0.29, 1.16)                               | 2.44 (0.74, 8.05)                     |
| Durham, NC                                                        | 0.47 (0.24, 0.92)                             | 0.45 (0.20, 0.99)                    | 0.28 (0.10, 0.82)                               | 0.49 (0.16, 1.52)                               | 0.39 (0.03, 5.43)                     |
| Nashville, TN                                                     | 0.77 (0.41, 1.45)                             | 1.24 (0.65, 2.36)                    | 0.88 (0.41, 1.91)                               | 0.38 (0.14, 1.04)                               | 0.97 (0.22, 4.30)                     |
| Seattle, WA                                                       | 0.88 (0.53, 1.45)                             | 1.06 (0.59, 1.89)                    | 0.61 (0.28, 1.36)                               | 0.79 (0.39, 1.63)                               | 0.32 (0.07, 1.50)                     |
| Black                                                             | 0.70 (0.42, 1.15)                             | 0.85 (0.48, 1.49)                    | 0.98 (0.41, 2.37)                               | 0.56 (0.23, 1.36)                               | 0.57 (0.08, 4.29)                     |
| Initial Screen Score                                              | 1.03 (1.01, 1.05)                             | 1.02 (1.01, 1.04)                    | 1.03 (1.01, 1.05)                               | 1.02 (1.00, 1.04)                               | 1.03 (0.99, 1.08)                     |
| Pre-Intervention Covariates                                       |                                               |                                      |                                                 |                                                 |                                       |
| Parental Depression                                               | 1.02 (1.00, 1.04)                             | 1.02 (1.00, 1.04)                    | 0.99 (0.97, 1.02)                               | 1.02 (0.99, 1.04)                               | 1.01 (0.97, 1.06)                     |
| Child Hostile Attribution                                         | 1.41 (0.61, 3.28)                             | 1.45 (0.58, 3.62)                    | 1.66 (0.48, 5.75)                               | 0.96 (0.33, 2.78)                               | 6.67 (0.94, 47.5)                     |
| Child Aggressive Behavior                                         | 1.00 (0.97, 1.03)                             | 1.01 (0.98, 1.04)                    | 1.02 (0.99, 1.06)                               | 1.00 (0.96, 1.04)                               | 0.97 (0.91, 1.03)                     |
| Child Emotional Appropriateness Score                             | 0.94 (0.76, 1.17)                             | 0.96 (0.75, 1.23)                    | 0.76 (0.56, 1.04)                               | 0.83 (0.63, 1.11)                               | 1.57 (0.70, 3.54)                     |
| Parental Family Satisfaction                                      | 1.19 (0.90, 1.57)                             | 0.96 (0.70, 1.32)                    | 0.81 (0.56, 1.19)                               | 1.96 (1.22, 3.15)                               | 1.95 (0.86, 4.41)                     |
| Parental Friendship Satisfaction                                  | 0.96 (0.66, 1.39)                             | 0.89 (0.61, 1.29)                    | 1.10 (0.67, 1.82)                               | 0.92 (0.56, 1.49)                               | 0.77 (0.43, 1.38)                     |
| Parent-Report of Physical Punishment                              | 0.88 (0.42, 1.82)                             | 0.72 (0.27, 1.87)                    | 0.90 (0.28, 2.92)                               | 1.28 (0.40, 4.10)                               | 5.39 (0.95, 30.5)                     |
| Parent-Report of Kindergarten Stress                              | 1.01 (0.97, 1.06)                             | 1.00 (0.95, 1.06)                    | 0.99 (0.93, 1.06)                               | 1.01 (0.95, 1.08)                               | 1.08 (0.99, 1.19)                     |
| Parent-Report of Verbal Punishment                                | 1.04 (0.53, 2.05)                             | 0.58 (0.31, 1.11)                    | 0.38 (0.13, 1.12)                               | 3.39 (1.59, 7.23)                               | 0.21 (0.03, 1.54)                     |
| Socioeconomic Status                                              | 0.99 (0.98, 1.01)                             | 0.99 (0.98, 1.01)                    | 0.99 (0.97, 1.01)                               | 0.99 (0.97, 1.02)                               | 1.00 (0.95, 1.05)                     |
| Child Oppositional Aggressive Score                               | 2.55 (0.77, 8.5)                              | 2.85 (0.69, 11.7)                    | 10.4 (1.56, 69.0)                               | 1.32 (0.21, 8.49)                               | 7.22 (0.14, 385)                      |
| Parental Harsh Discipline, Warmth, & Appropriate Discipline Score | 2.38 (1.31, 4.31)                             | 2.94 (1.25, 6.91)                    | 2.36 (0.95, 5.90)                               | 1.18 (0.40, 3.50)                               | 2.58 (0.45, 14.8)                     |
| Child Social Competence - Parent Report                           | 1.00 (0.71, 1.39)                             | 1.05 (0.71, 1.54)                    | 0.86 (0.53, 1.41)                               | 0.81 (0.49, 1.35)                               | 0.97 (0.42, 2.23)                     |
| Child Woodcock-Johnson Word Identification Score                  | 1.03 (0.98, 1.09)                             | 1.03 (0.97, 1.09)                    | 1.03 (0.96, 1.11)                               | 0.99 (0.93, 1.06)                               | 0.97 (0.85, 1.10)                     |
| Child Emotional Recognition                                       | 0.99 (0.92, 1.07)                             | 1.06 (0.96, 1.17)                    | 0.96 (0.85, 1.08)                               | 0.99 (0.88, 1.10)                               | 1.00 (0.81, 1.24)                     |
| Parental Warmth                                                   | 1.18 (0.92, 1.51)                             | 1.23 (0.95, 1.59)                    | 1.30 (0.90, 1.88)                               | 1.32 (0.91, 1.92)                               | 1.50 (0.75, 2.98)                     |
| Child Competent Social Problem Solving Score                      | 0.46 (0.21, 1.01)                             | 0.41 (0.18, 0.94)                    | 1.19 (0.34, 4.08)                               | 0.52 (0.14, 1.83)                               | 0.37 (0.06, 2.29)                     |
| Parental Neighborhood Satisfaction Score                          | 1.12 (0.80, 1.57)                             | 1.11 (0.75, 1.64)                    | 0.89 (0.54, 1.45)                               | 1.19 (0.75, 1.90)                               | 0.92 (0.46, 1.81)                     |
| Child Wechsler Intelligence Scale Average Vocab & Block Design    | 0.93 (0.70, 1.24)                             | 0.86 (0.64, 1.14)                    | 0.79 (0.50, 1.26)                               | 0.89 (0.59, 1.34)                               | 0.86 (0.41, 1.77)                     |

Table S2: Complete Results for FIML Logistic Regressions Estimating Moderation of Intervention Effect by Sex (N=891)

|                                                                   | Any Behavior of<br>Despair | Suicidal Ideation | Suicide<br>Attempt/Self-Harm | Weekly Hazardous<br>Drinking | Weekly Opioid Use  |
|-------------------------------------------------------------------|----------------------------|-------------------|------------------------------|------------------------------|--------------------|
|                                                                   | Age 15-20, 25              | Age 15-20, 25     | Age 15-20, 25                | Age 15-20, 25                | Age 19, 20, 25     |
|                                                                   | OR (95% CI)                | OR (95% CI)       | OR (95% CI)                  | OR (95% CI)                  | OR (95% CI)        |
| Intervention                                                      | 0.77 (0.44, 1.37)          | 0.85 (0.45, 1.60) | 1.61 (0.75, 3.48)            | 0.57 (0.18, 1.78)            | 0.36 (0.04, 3.62)  |
| Intervention*Male                                                 | 0.66 (0.33, 1.31)          | 0.49 (0.22, 1.11) | 0.22 (0.08, 0.63)            | 0.96 (0.27, 3.45)            | 1.1 (0.08, 15.27)  |
| Male                                                              | 1.13 (0.69, 1.86)          | 0.83 (0.50, 1.37) | 1.00 (0.50, 1.97)            | 2.93 (1.19, 7.19)            | 1.55 (0.39, 6.21)  |
| Cohort 1                                                          | 1.32 (0.87, 2.00)          | 1.48 (0.87, 2.54) | 2.07 (0.98, 4.35)            | 1.33 (0.71, 2.48)            | 1.35 (0.33, 5.55)  |
| Cohort 2                                                          | 1.25 (0.82, 1.90)          | 1.69 (1.01, 2.84) | 3.19 (1.62, 6.29)            | 0.58 (0.29, 1.16)            | 2.43 (0.73, 8.13)  |
| Durham, NC                                                        | 0.46 (0.24, 0.90)          | 0.43 (0.19, 0.95) | 0.25 (0.08, 0.75)            | 0.49 (0.16, 1.53)            | 0.40 (0.03, 5.50)  |
| Nashville, TN                                                     | 0.77 (0.41, 1.45)          | 1.24 (0.66, 2.35) | 0.88 (0.40, 1.95)            | 0.38 (0.14, 1.04)            | 0.97 (0.22, 4.31)  |
| Seattle, WA                                                       | 0.86 (0.52, 1.42)          | 1.02 (0.57, 1.81) | 0.56 (0.25, 1.26)            | 0.79 (0.39, 1.63)            | 0.32 (0.07, 1.56)  |
| Black                                                             | 0.72 (0.43, 1.18)          | 0.88 (0.51, 1.54) | 1.08 (0.46, 2.55)            | 0.56 (0.23, 1.37)            | 0.57 (0.07, 4.41)  |
| Initial Screen Score                                              | 1.03 (1.01, 1.05)          | 1.02 (1.01, 1.04) | 1.03 (1.01, 1.05)            | 1.02 (1.00, 1.04)            | 1.03 (0.99, 1.08)  |
| Pre-Intervention Covariates                                       |                            |                   |                              |                              |                    |
| Parental Depression                                               | 1.02 (1.00, 1.04)          | 1.02 (1.00, 1.04) | 0.99 (0.97, 1.02)            | 1.02 (0.99, 1.04)            | 1.01 (0.97, 1.06)  |
| Child Hostile Attribution                                         | 1.4 (0.61, 3.24)           | 1.45 (0.59, 3.57) | 1.71 (0.50, 5.88)            | 0.96 (0.33, 2.78)            | 6.67 (0.94, 47.3)  |
| Child Aggressive Behavior                                         | 1.00 (0.97, 1.03)          | 1.01 (0.98, 1.04) | 1.02 (0.98, 1.06)            | 1.00 (0.96, 1.04)            | 0.97 (0.91, 1.03)  |
| Child Emotional Appropriateness Score                             | 0.94 (0.76, 1.17)          | 0.95 (0.74, 1.22) | 0.76 (0.56, 1.02)            | 0.83 (0.63, 1.11)            | 1.58 (0.70, 3.54)  |
| Parental Family Satisfaction                                      | 1.19 (0.90, 1.57)          | 0.96 (0.71, 1.31) | 0.81 (0.56, 1.17)            | 1.95 (1.21, 3.15)            | 1.95 (0.85, 4.45)  |
| Parental Friendship Satisfaction                                  | 0.96 (0.67, 1.40)          | 0.89 (0.61, 1.3)  | 1.13 (0.68, 1.87)            | 0.92 (0.56, 1.49)            | 0.77 (0.43, 1.37)  |
| Parent-Report of Physical Punishment                              | 0.86 (0.42, 1.79)          | 0.7 (0.27, 1.81)  | 0.87 (0.26, 2.85)            | 1.28 (0.40, 4.10)            | 5.37 (0.96, 30.0)  |
| Parent-Report of Kindergarten Stress                              | 1.01 (0.97, 1.06)          | 1.00 (0.95, 1.06) | 0.99 (0.92, 1.06)            | 1.01 (0.95, 1.08)            | 1.08 (0.99, 1.19)  |
| Parent-Report of Verbal Punishment                                | 1.04 (0.53, 2.06)          | 0.59 (0.31, 1.13) | 0.40 (0.14, 1.14)            | 3.39 (1.59, 7.21)            | 0.21 (0.03, 1.55)  |
| Socioeconomic Status                                              | 0.99 (0.98, 1.01)          | 0.99 (0.98, 1.01) | 0.99 (0.97, 1.02)            | 0.99 (0.97, 1.02)            | 1.00 (0.95, 1.05)  |
| Child Oppositional Aggressive Score                               | 2.67 (0.80, 8.91)          | 3.06 (0.74, 12.6) | 12.4 (1.81, 84.5)            | 1.33 (0.20, 8.68)            | 7.18 (0.13, 389.5) |
| Parental Harsh Discipline, Warmth, & Appropriate Discipline Score | 2.35 (1.29, 4.27)          | 2.92 (1.23, 6.93) | 2.45 (0.96, 6.27)            | 1.18 (0.39, 3.55)            | 2.58 (0.45, 15.0)  |
| Child Social Competence - Parent Report                           | 1.01 (0.73, 1.41)          | 1.08 (0.74, 1.59) | 0.90 (0.54, 1.48)            | 0.82 (0.49, 1.36)            | 0.97 (0.43, 2.18)  |
| Child Woodcock-Johnson Word Identification Score                  | 1.03 (0.98, 1.09)          | 1.03 (0.97, 1.09) | 1.03 (0.96, 1.11)            | 0.99 (0.93, 1.06)            | 0.97 (0.85, 1.10)  |
| Child Emotional Recognition                                       | 0.99 (0.91, 1.07)          | 1.05 (0.95, 1.16) | 0.94 (0.83, 1.07)            | 0.99 (0.88, 1.10)            | 1.00 (0.81, 1.24)  |
| Parental Warmth                                                   | 1.19 (0.93, 1.52)          | 1.25 (0.97, 1.62) | 1.37 (0.93, 2.01)            | 1.32 (0.90, 1.93)            | 1.50 (0.75, 2.98)  |
| Child Competent Social Problem Solving Score                      | 0.44 (0.20, 0.98)          | 0.39 (0.18, 0.89) | 1.10 (0.31, 3.85)            | 0.51 (0.14, 1.85)            | 0.38 (0.06, 2.33)  |
| Parental Neighborhood Satisfaction Score                          | 1.13 (0.81, 1.58)          | 1.12 (0.76, 1.65) | 0.90 (0.55, 1.47)            | 1.19 (0.75, 1.90)            | 0.91 (0.46, 1.82)  |
| Child Wechsler Intelligence Scale Average Vocab & Block Design    | 0.93 (0.70, 1.24)          | 0.86 (0.64, 1.14) | 0.80 (0.50, 1.27)            | 0.89 (0.59, 1.34)            | 0.85 (0.41, 1.79)  |

Table S3: Complete Results for FIML Logistic Regressions Estimating Moderation of Intervention Effect by Race (N=891)

|                                                                   | Any Behavior of<br>Despair | Suicidal Ideation | Suicide<br>Attempt/Self-<br>Harm | Weekly<br>Hazardous<br>Drinking | Weekly Opioid Use |
|-------------------------------------------------------------------|----------------------------|-------------------|----------------------------------|---------------------------------|-------------------|
|                                                                   | Age 15-20, 25              | Age 15-20, 25     | Age 15-20, 25                    | Age 15-20, 25                   | Age 19, 20, 25    |
|                                                                   | OR (95% CI)                | OR (95% CI)       | OR (95% CI)                      | OR (95% CI)                     | OR (95% CI)       |
| Intervention                                                      | 0.40 (0.65, 1.06)          | 0.35 (0.61, 1.08) | 0.42 (0.83, 1.62)                | 0.31 (0.59, 1.11)               | 0.07 (0.25, 0.95) |
| Intervention*Black                                                | 0.39 (0.78, 1.57)          | 0.33 (0.78, 1.82) | 0.23 (0.66, 1.89)                | 0.28 (0.79, 2.28)               | 0.34 (3.21, 30.5) |
| Male                                                              | 0.65 (0.95, 1.37)          | 0.40 (0.61, 0.92) | 0.29 (0.52, 0.92)                | 1.50 (2.89, 5.55)               | 0.42 (1.55, 5.78) |
| Cohort 1                                                          | 0.85 (1.30, 1.97)          | 0.85 (1.45, 2.47) | 0.96 (1.95, 3.96)                | 0.71 (1.32, 2.46)               | 0.31 (1.32, 5.67) |
| Cohort 2                                                          | 0.81 (1.23, 1.86)          | 0.98 (1.64, 2.74) | 1.53 (2.97, 5.75)                | 0.29 (0.58, 1.16)               | 0.70 (2.49, 8.85) |
| Durham, NC                                                        | 0.24 (0.47, 0.91)          | 0.20 (0.44, 0.98) | 0.09 (0.27, 0.81)                | 0.16 (0.49, 1.51)               | 0.03 (0.39, 5.70) |
| Nashville, TN                                                     | 0.41 (0.78, 1.47)          | 0.65 (1.24, 2.37) | 0.41 (0.88, 1.92)                | 0.14 (0.38, 1.05)               | 0.20 (0.90, 4.04) |
| Seattle, WA                                                       | 0.54 (0.89, 1.46)          | 0.60 (1.06, 1.89) | 0.28 (0.62, 1.36)                | 0.39 (0.8, 1.63)                | 0.07 (0.31, 1.43) |
| Black                                                             | 0.45 (0.79, 1.38)          | 0.50 (0.95, 1.82) | 0.42 (1.18, 3.35)                | 0.23 (0.62, 1.68)               | 0.04 (0.38, 3.71) |
| Initial Screen Score                                              | 1.01 (1.03, 1.05)          | 1.01 (1.02, 1.04) | 1.01 (1.03, 1.05)                | 1.00 (1.02, 1.04)               | 0.99 (1.03, 1.07) |
| Pre-Intervention Covariates                                       |                            |                   |                                  |                                 |                   |
| Parental Depression                                               | 1.00 (1.02, 1.04)          | 1.00 (1.02, 1.04) | 0.97 (0.99, 1.02)                | 0.99 (1.02, 1.04)               | 0.97 (1.01, 1.06) |
| Child Hostile Attribution                                         | 0.61 (1.41, 3.26)          | 0.58 (1.45, 3.6)  | 0.48 (1.68, 5.88)                | 0.33 (0.96, 2.76)               | 0.9 (6.41, 45.84) |
| Child Aggressive Behavior                                         | 0.97 (1.00, 1.03)          | 0.98 (1.01, 1.04) | 0.99 (1.02, 1.06)                | 0.97 (1.00, 1.04)               | 0.91 (0.97, 1.03) |
| Child Emotional Appropriateness Score                             | 0.76 (0.94, 1.16)          | 0.75 (0.96, 1.23) | 0.56 (0.76, 1.04)                | 0.63 (0.83, 1.1)                | 0.71 (1.62, 3.65) |
| Parental Family Satisfaction                                      | 0.90 (1.18, 1.56)          | 0.70 (0.96, 1.31) | 0.55 (0.81, 1.18)                | 1.21 (1.95, 3.13)               | 0.83 (1.93, 4.51) |
| Parental Friendship Satisfaction                                  | 0.66 (0.96, 1.39)          | 0.60 (0.88, 1.29) | 0.66 (1.1, 1.81)                 | 0.56 (0.91, 1.48)               | 0.43 (0.79, 1.44) |
| Parent-Report of Physical Punishment                              | 0.42 (0.88, 1.82)          | 0.27 (0.71, 1.86) | 0.28 (0.9, 2.89)                 | 0.40 (1.29, 4.11)               | 0.91 (5.32, 31.2) |
| Parent-Report of Kindergarten Stress                              | 0.97 (1.01, 1.06)          | 0.95 (1.00, 1.06) | 0.93 (0.99, 1.06)                | 0.95 (1.01, 1.08)               | 0.99 (1.09, 1.20) |
| Parent-Report of Verbal Punishment                                | 0.53 (1.04, 2.05)          | 0.31 (0.58, 1.11) | 0.13 (0.38, 1.11)                | 1.59 (3.39, 7.21)               | 0.03 (0.21, 1.61) |
| Socioeconomic Status                                              | 0.98 (0.99, 1.01)          | 0.98 (0.99, 1.01) | 0.97 (0.99, 1.01)                | 0.97 (0.99, 1.02)               | 0.95 (1.00, 1.05) |
| Child Oppositional Aggressive Score                               | 0.76 (2.52, 8.33)          | 0.68 (2.80, 11.5) | 1.54 (10.1, 65.9)                | 0.21 (1.32, 8.41)               | 0.12 (7.01, 406)  |
| Parental Harsh Discipline, Warmth, & Appropriate Discipline Score | 1.31 (2.37, 4.30)          | 1.24 (2.93, 6.92) | 0.94 (2.36, 5.94)                | 0.40 (1.18, 3.52)               | 0.41 (2.42, 14.2) |
| Child Social Competence - Parent Report                           | 0.71 (1.00, 1.39)          | 0.71 (1.05, 1.54) | 0.52 (0.86, 1.41)                | 0.49 (0.82, 1.35)               | 0.43 (0.97, 2.2)  |
| Child Woodcock-Johnson Word Identification Score                  | 0.98 (1.03, 1.09)          | 0.97 (1.03, 1.09) | 0.96 (1.03, 1.11)                | 0.93 (0.99, 1.06)               | 0.85 (0.96, 1.09) |
| Child Emotional Recognition                                       | 0.92 (0.99, 1.07)          | 0.96 (1.06, 1.17) | 0.85 (0.95, 1.08)                | 0.88 (0.99, 1.10)               | 0.81 (1.00, 1.25) |
| Parental Warmth                                                   | 0.92 (1.18, 1.50)          | 0.95 (1.23, 1.58) | 0.90 (1.30, 1.90)                | 0.91 (1.31, 1.91)               | 0.75 (1.47, 2.88) |
| Child Competent Social Problem Solving Score                      | 0.21 (0.45, 1.00)          | 0.18 (0.41, 0.93) | 0.34 (1.16, 3.92)                | 0.14 (0.51, 1.8)                | 0.06 (0.37, 2.43) |
| Parental Neighborhood Satisfaction Score                          | 0.8 (1.13, 1.58)           | 0.76 (1.11, 1.64) | 0.55 (0.9, 1.47)                 | 0.75 (1.19, 1.9)                | 0.45 (0.90, 1.82) |
| Child Wechsler Intelligence Scale Average Vocab & Block Design    | 0.70 (0.93, 1.24)          | 0.64 (0.86, 1.14) | 0.50 (0.79, 1.25)                | 0.59 (0.89, 1.33)               | 0.41 (0.89, 1.91) |

Table S4: Complete FIML Results Estimating Mediation of Intervention Effect by Elementary and Middle School Skills (N=891)

|                                                                   | Any Behavior of<br>Despair | Suicidal Ideation  | Suicide<br>Attempt/Self-Harm | Weekly Hazardous<br>Drinking | Weekly Opioid Use  |
|-------------------------------------------------------------------|----------------------------|--------------------|------------------------------|------------------------------|--------------------|
|                                                                   | Age 15-20, 25              | Age 15-20, 25      | Age 15-20, 25                | Age 15-20, 25                | Age 19, 20, 25     |
| <b>Outcome on:</b>                                                | <b>OR (95% CI)</b>         | <b>OR (95% CI)</b> | <b>OR (95% CI)</b>           | <b>OR (95% CI)</b>           | <b>OR (95% CI)</b> |
| Intervention                                                      | 0.67 (0.44, 0.98)          | 0.65 (0.38, 1.00)  | 0.79 (0.39, 1.45)            | 0.57 (0.25, 1.00)            | 0.50 (0.14, 1.24)  |
| Interpersonal Skills Gr1-Gr8                                      | 0.66 (0.52, 0.81)          | 0.62 (0.47, 0.77)  | 0.72 (0.50, 1.02)            | 0.74 (0.50, 1.08)            | 0.67 (0.41, 1.09)  |
| Intrapersonal Skills Gr1-Gr5                                      | 1.10 (0.88, 1.40)          | 1.07 (0.83, 1.40)  | 1.05 (0.71, 1.54)            | 1.41 (1.01, 2.18)            | 0.80 (0.56, 1.15)  |
| Academic Skills Gr1-Gr3                                           | 1.06 (0.85, 1.36)          | 1.00 (0.75, 1.40)  | 0.96 (0.65, 1.59)            | 1.14 (0.83, 1.66)            | 1.07 (0.67, 2.23)  |
| Male                                                              | 0.81 (0.52, 1.19)          | 0.5 (0.29, 0.73)   | 0.44 (0.19, 0.77)            | 2.73 (1.48, 6.84)            | 1.27 (0.42, 6.99)  |
| Cohort 1                                                          | 1.27 (0.81, 2.17)          | 1.35 (0.72, 2.58)  | 1.90 (0.84, 5.05)            | 1.37 (0.72, 3.38)            | 1.34 (0.31, 11.16) |
| Cohort 2                                                          | 1.25 (0.79, 1.99)          | 1.66 (0.92, 3.02)  | 3.02 (1.52, 8.36)            | 0.59 (0.22, 1.24)            | 2.15 (0.68, 16.0)  |
| Durham, NC                                                        | 0.53 (0.24, 1.07)          | 0.48 (0.18, 1.12)  | 0.30 (0.06, 0.83)            | 0.58 (0.14, 2.07)            | 0.48 (0.00, 5.24)  |
| Nashville, TN                                                     | 0.78 (0.37, 1.55)          | 1.25 (0.58, 2.62)  | 0.89 (0.28, 2.05)            | 0.37 (0.08, 1.08)            | 1.14 (0.17, 4.91)  |
| Seattle, WA                                                       | 0.80 (0.45, 1.38)          | 0.95 (0.49, 1.84)  | 0.57 (0.19, 1.31)            | 0.73 (0.28, 1.57)            | 0.33 (0.00, 1.04)  |
| Black                                                             | 0.63 (0.36, 1.10)          | 0.76 (0.41, 1.51)  | 0.94 (0.39, 2.89)            | 0.51 (0.16, 1.29)            | 0.55 (0.05, 3.25)  |
| Initial Screen Score                                              | 1.03 (1.01, 1.05)          | 1.02 (1.00, 1.04)  | 1.02 (1.00, 1.05)            | 1.02 (0.99, 1.05)            | 1.03 (0.98, 1.07)  |
| Pre-Intervention Covariates                                       |                            |                    |                              |                              |                    |
| Parental Depression                                               | 1.02 (1.00, 1.04)          | 1.02 (1.00, 1.04)  | 0.99 (0.95, 1.02)            | 1.02 (0.99, 1.06)            |                    |
| Child Hostile Attribution                                         | 1.25 (0.52, 3.20)          | 1.27 (0.47, 3.51)  | 1.49 (0.40, 7.22)            | 0.86 (0.26, 3.51)            |                    |
| Child Aggressive Behavior                                         | 1.00 (0.97, 1.03)          | 1.01 (0.97, 1.04)  | 1.02 (0.98, 1.07)            | 1.00 (0.96, 1.05)            |                    |
| Child Emotional Appropriateness Score                             | 0.96 (0.75, 1.24)          | 0.99 (0.74, 1.34)  | 0.77 (0.52, 1.10)            | 0.84 (0.59, 1.19)            |                    |
| Parental Family Satisfaction                                      | 1.20 (0.89, 1.67)          | 0.96 (0.67, 1.39)  | 0.81 (0.51, 1.29)            | 2.04 (1.31, 4.05)            |                    |
| Parental Friendship Satisfaction                                  | 0.97 (0.64, 1.48)          | 0.89 (0.57, 1.37)  | 1.10 (0.64, 2.06)            | 0.95 (0.55, 1.65)            |                    |
| Parent-Report of Physical Punishment                              | 0.73 (0.30, 1.61)          | 0.56 (0.17, 1.62)  | 0.80 (0.17, 3.41)            | 1.29 (0.28, 5.09)            |                    |
| Parent-Report of Kindergarten Stress                              | 1.01 (0.96, 1.07)          | 1.00 (0.94, 1.07)  | 0.99 (0.91, 1.06)            | 1.01 (0.93, 1.09)            |                    |
| Parent-Report of Verbal Punishment                                | 1.08 (0.51, 2.36)          | 0.59 (0.27, 1.23)  | 0.38 (0.08, 1.07)            | 3.43 (1.55, 10.0)            |                    |
| Socioeconomic Status                                              | 0.99 (0.98, 1.01)          | 0.99 (0.98, 1.01)  | 0.99 (0.97, 1.02)            | 1.00 (0.97, 1.02)            |                    |
| Child Oppositional Aggressive Score                               | 1.53 (0.42, 6.33)          | 1.57 (0.33, 8.33)  | 7.12 (1.02, 86.4)            | 0.80 (0.10, 6.13)            |                    |
| Parental Harsh Discipline, Warmth, & Appropriate Discipline Score | 2.29 (1.29, 4.91)          | 2.90 (1.22, 8.80)  | 2.37 (0.93, 8.65)            | 1.22 (0.40, 4.87)            |                    |
| Child Social Competence - Parent Report                           | 1.10 (0.74, 1.64)          | 1.18 (0.75, 1.89)  | 0.94 (0.5, 1.69)             | 0.84 (0.42, 1.52)            |                    |
| Child Woodcock-Johnson Word Identification Score                  | 1.03 (0.98, 1.10)          | 1.03 (0.97, 1.11)  | 1.04 (0.95, 1.13)            | 0.98 (0.90, 1.05)            |                    |
| Child Emotional Recognition                                       | 0.98 (0.90, 1.08)          | 1.06 (0.95, 1.19)  | 0.96 (0.82, 1.11)            | 0.96 (0.83, 1.08)            |                    |
| Parental Warmth                                                   | 1.21 (0.92, 1.63)          | 1.28 (0.96, 1.78)  | 1.36 (0.88, 2.18)            | 1.32 (0.91, 2.16)            |                    |

|                                                                |                   |                   |                   |                   |
|----------------------------------------------------------------|-------------------|-------------------|-------------------|-------------------|
| Child Competent Social Problem Solving Score                   | 0.42 (0.16, 1.02) | 0.39 (0.14, 0.93) | 1.18 (0.30, 5.65) | 0.37 (0.07, 1.85) |
| Parental Neighborhood Satisfaction Score                       | 1.14 (0.81, 1.65) | 1.14 (0.74, 1.75) | 0.92 (0.51, 1.54) | 1.19 (0.72, 2.14) |
| Child Wechsler Intelligence Scale Average Vocab & Block Design | 0.93 (0.68, 1.29) | 0.88 (0.63, 1.20) | 0.83 (0.45, 1.42) | 0.86 (0.49, 1.39) |

**Indirect Intervention Effect through:**

|                              |                   |                   |                   |                   |                   |
|------------------------------|-------------------|-------------------|-------------------|-------------------|-------------------|
| Interpersonal Skills Gr1-Gr8 | 0.84 (0.74, 0.92) | 0.82 (0.71, 0.91) | 0.87 (0.74, 1.01) | 0.88 (0.75, 1.03) | 0.82 (0.63, 1.04) |
| Intrapersonal Skills Gr1-Gr5 | 1.03 (0.95, 1.13) | 1.02 (0.93, 1.12) | 1.02 (0.89, 1.16) | 1.12 (1.00, 1.33) | 0.92 (0.79, 1.05) |
| Academic Skills Gr1-Gr3      | 1.01 (0.97, 1.04) | 1.00 (0.95, 1.04) | 1.00 (0.93, 1.06) | 1.02 (0.97, 1.08) | 1.01 (0.92, 1.18) |

**Interpersonal Skills Gr1-Gr8 on**

|                                                                   | <b>b (95% CI)</b>    |
|-------------------------------------------------------------------|----------------------|----------------------|----------------------|----------------------|----------------------|
| Intervention                                                      | 0.42 (0.28, 0.55)    | 0.42 (0.28, 0.55)    | 0.42 (0.28, 0.55)    | 0.42 (0.28, 0.55)    | 0.48 (0.34, 0.62)    |
| Male                                                              | -0.37 (-0.50, -0.22) | -0.37 (-0.50, -0.22) | -0.37 (-0.5, -0.22)  | -0.37 (-0.51, -0.22) | -0.32 (-0.46, -0.18) |
| Cohort 1                                                          | -0.18 (-0.35, 0.01)  | -0.18 (-0.35, 0.01)  | -0.18 (-0.35, 0.01)  | -0.18 (-0.35, 0.01)  | -0.17 (-0.36, 0.04)  |
| Cohort 2                                                          | -0.03 (-0.20, 0.16)  | -0.03 (-0.20, 0.16)  | -0.03 (-0.20, 0.16)  | -0.03 (-0.02, 0.16)  | 0.02 (-0.17, 0.23)   |
| Durham, NC                                                        | 0.31 (0.07, 0.53)    | 0.31 (0.07, 0.54)    | 0.31 (0.07, 0.54)    | 0.31 (0.07, 0.54)    | 0.33 (0.07, 0.59)    |
| Nashville, TN                                                     | 0.14 (-0.09, 0.38)   | 0.14 (-0.09, 0.38)   | 0.14 (-0.09, 0.38)   | 0.13 (-0.09, 0.38)   | -0.01 (-0.25, 0.25)  |
| Seattle, WA                                                       | -0.19 (-0.37, -0.02) | -0.19 (-0.37, -0.02) | -0.19 (-0.37, -0.02) | -0.19 (-0.37, -0.02) | -0.10 (-0.29, 0.09)  |
| Black                                                             | -0.33 (-0.51, -0.15) | -0.33 (-0.51, -0.15) | -0.33 (-0.51, -0.15) | -0.33 (-0.51, -0.15) | -0.38 (-0.55, -0.22) |
| Initial Screen Score                                              | -0.01 (-0.02, 0.00)  | -0.01 (-0.02, 0.00)  | -0.01 (-0.02, 0.00)  | -0.01 (-0.02, 0.00)  | -0.02 (-0.03, -0.01) |
| Pre-Intervention Covariates                                       |                      |                      |                      |                      |                      |
| Parental Depression                                               | 0.00 (-0.01, 0.00)   | 0.00 (-0.01, 0.00)   | 0.00 (-0.01, 0.00)   | 0.00 (-0.01, 0.00)   |                      |
| Child Hostile Attribution                                         | -0.26 (-0.50, 0.00)  | -0.26 (-0.50, 0.00)  | -0.26 (-0.49, 0.00)  | -0.26 (-0.5, 0.00)   |                      |
| Child Aggressive Behavior                                         | -0.01 (-0.01, 0.00)  | -0.01 (-0.01, 0.00)  | -0.01 (-0.01, 0.00)  | -0.01 (-0.01, 0.00)  |                      |
| Child Emotional Appropriateness Score                             | 0.05 (-0.04, 0.15)   | 0.05 (-0.04, 0.15)   | 0.05 (-0.04, 0.15)   | 0.05 (-0.04, 0.15)   |                      |
| Parental Family Satisfaction                                      | -0.01 (-0.11, 0.09)  | -0.01 (-0.11, 0.09)  | -0.01 (-0.11, 0.09)  | -0.01 (-0.11, 0.09)  |                      |
| Parental Friendship Satisfaction                                  | 0.02 (-0.09, 0.13)   | 0.02 (-0.09, 0.13)   | 0.02 (-0.09, 0.13)   | 0.02 (-0.09, 0.12)   |                      |
| Parent-Report of Physical Punishment                              | -0.31 (-0.59, -0.04) | -0.31 (-0.59, -0.04) | -0.31 (-0.6, -0.04)  | -0.31 (-0.59, -0.04) |                      |
| Parent-Report of Kindergarten Stress                              | 0.00 (-0.02, 0.01)   | 0.00 (-0.02, 0.01)   | 0.00 (-0.02, 0.01)   | 0.00 (-0.02, 0.01)   |                      |
| Parent-Report of Verbal Punishment                                | 0.04 (-0.16, 0.25)   | 0.04 (-0.16, 0.25)   | 0.04 (-0.16, 0.25)   | 0.04 (-0.16, 0.25)   |                      |
| Socioeconomic Status                                              | 0.01 (0.00, 0.01)    | 0.01 (0.00, 0.01)    | 0.01 (0.00, 0.01)    | 0.01 (0.00, 0.01)    |                      |
| Child Oppositional Aggressive Score                               | -1.06 (-1.47, -0.64) | -1.06 (-1.47, -0.63) | -1.06 (-1.47, -0.63) | -1.06 (-1.47, -0.63) |                      |
| Parental Harsh Discipline, Warmth, & Appropriate Discipline Score | -0.09 (-0.33, 0.15)  | -0.10 (-0.33, 0.15)  | -0.09 (-0.33, 0.15)  | -0.09 (-0.33, 0.15)  |                      |
| Child Social Competence - Parent Report                           | 0.24 (0.11, 0.35)    | 0.24 (0.11, 0.35)    | 0.24 (0.11, 0.35)    | 0.24 (0.11, 0.36)    |                      |
| Child Woodcock-Johnson Word Identification Score                  | 0.01 (0.00, 0.03)    | 0.01 (0.00, 0.03)    | 0.01 (0.00, 0.03)    | 0.01 (0.00, 0.03)    |                      |
| Child Emotional Recognition                                       | 0.00 (-0.03, 0.03)   | 0.00 (-0.03, 0.03)   | 0.00 (-0.03, 0.03)   | 0.00 (-0.03, 0.03)   |                      |
| Parental Warmth                                                   | 0.02 (-0.07, 0.11)   | 0.02 (-0.07, 0.11)   | 0.02 (-0.07, 0.11)   | 0.02 (-0.07, 0.11)   |                      |

|                                                                |                    |                    |                    |                    |
|----------------------------------------------------------------|--------------------|--------------------|--------------------|--------------------|
| Child Competent Social Problem Solving Score                   | 0.13 (-0.18, 0.44) | 0.13 (-0.18, 0.44) | 0.13 (-0.17, 0.44) | 0.13 (-0.17, 0.45) |
| Parental Neighborhood Satisfaction Score                       | 0.07 (-0.04, 0.17) | 0.07 (-0.04, 0.17) | 0.07 (-0.04, 0.17) | 0.07 (-0.04, 0.17) |
| Child Wechsler Intelligence Scale Average Vocab & Block Design | 0.09 (-0.01, 0.18) | 0.09 (-0.01, 0.18) | 0.09 (-0.01, 0.18) | 0.09 (-0.01, 0.18) |

**Intrapersonal Skills Gr1-Gr5 on**

|                                                                   | <b>b (95% CI)</b>    |
|-------------------------------------------------------------------|----------------------|----------------------|----------------------|----------------------|----------------------|
| Intervention                                                      | 0.33 (0.21, 0.46)    | 0.33 (0.21, 0.46)    | 0.33 (0.21, 0.46)    | 0.33 (0.21, 0.46)    | 0.36 (0.23, 0.50)    |
| Male                                                              | -0.21 (-0.33, -0.10) | -0.21 (-0.33, -0.10) | -0.21 (-0.33, -0.10) | -0.21 (-0.33, -0.10) | -0.19 (-0.31, -0.06) |
| Cohort 1                                                          | -0.13 (-0.29, 0.03)  | -0.13 (-0.29, 0.02)  | -0.13 (-0.29, 0.03)  | -0.13 (-0.29, 0.03)  | -0.16 (-0.32, 0.01)  |
| Cohort 2                                                          | -0.06 (-0.20, 0.09)  | -0.06 (-0.20, 0.09)  | -0.06 (-0.20, 0.09)  | -0.06 (-0.20, 0.09)  | -0.04 (-0.19, 0.13)  |
| Durham, NC                                                        | -0.16 (-0.38, 0.05)  | -0.16 (-0.38, 0.05)  | -0.16 (-0.38, 0.05)  | -0.16 (-0.38, 0.05)  | -0.24 (-0.48, 0.01)  |
| Nashville, TN                                                     | -0.19 (-0.40, 0.00)  | -0.19 (-0.40, 0.00)  | -0.19 (-0.40, 0.00)  | -0.20 (-0.40, 0.00)  | -0.36 (-0.59, -0.13) |
| Seattle, WA                                                       | 0.24 (0.07, 0.43)    | 0.24 (0.07, 0.43)    | 0.24 (0.07, 0.43)    | 0.24 (0.07, 0.43)    | 0.38 (0.19, 0.59)    |
| Black                                                             | -0.10 (-0.24, 0.04)  | -0.10 (-0.24, 0.04)  | -0.1 (-0.25, 0.04)   | -0.10 (-0.24, 0.04)  | -0.26 (-0.41, -0.12) |
| Initial Screen Score                                              | 0.00 (-0.01, 0.00)   | 0.00 (-0.01, 0.00)   | 0.00 (-0.01, 0.00)   | 0.00 (-0.01, 0.00)   | -0.01 (-0.01, 0.00)  |
| <b>Pre-Intervention Covariates</b>                                |                      |                      |                      |                      |                      |
| Parental Depression                                               | 0.00 (-0.01, 0.01)   | 0.00 (-0.01, 0.01)   | 0.00 (-0.01, 0.01)   | 0.00 (-0.01, 0.01)   | 0.00 (-0.01, 0.01)   |
| Child Hostile Attribution                                         | 0.07 (-0.16, 0.33)   | 0.07 (-0.16, 0.33)   | 0.07 (-0.16, 0.33)   | 0.07 (-0.16, 0.33)   | 0.07 (-0.16, 0.33)   |
| Child Aggressive Behavior                                         | -0.02 (-0.02, -0.01) | -0.02 (-0.02, -0.01) | -0.02 (-0.02, -0.01) | -0.02 (-0.02, -0.01) | -0.02 (-0.02, -0.01) |
| Child Emotional Appropriateness Score                             | 0.07 (-0.02, 0.15)   | 0.07 (-0.02, 0.15)   | 0.07 (-0.02, 0.15)   | 0.07 (-0.02, 0.15)   | 0.07 (-0.02, 0.15)   |
| Parental Family Satisfaction                                      | 0.01 (-0.08, 0.10)   | 0.01 (-0.08, 0.10)   | 0.01 (-0.08, 0.10)   | 0.01 (-0.08, 0.10)   | 0.01 (-0.08, 0.10)   |
| Parental Friendship Satisfaction                                  | 0.00 (-0.12, 0.12)   | 0.00 (-0.12, 0.12)   | 0.00 (-0.12, 0.12)   | 0.00 (-0.12, 0.12)   | 0.00 (-0.12, 0.12)   |
| Parent-Report of Physical Punishment                              | -0.11 (-0.39, 0.17)  | -0.11 (-0.39, 0.17)  | -0.11 (-0.39, 0.17)  | -0.11 (-0.39, 0.17)  | -0.11 (-0.39, 0.17)  |
| Parent-Report of Kindergarten Stress                              | 0.00 (-0.02, 0.02)   | 0.00 (-0.02, 0.02)   | 0.00 (-0.02, 0.02)   | 0.00 (-0.02, 0.02)   | 0.00 (-0.02, 0.02)   |
| Parent-Report of Verbal Punishment                                | -0.13 (-0.39, 0.12)  | -0.13 (-0.39, 0.12)  | -0.13 (-0.39, 0.12)  | -0.13 (-0.39, 0.12)  | -0.13 (-0.39, 0.12)  |
| Socioeconomic Status                                              | 0.00 (-0.01, 0.00)   | 0.00 (-0.01, 0.00)   | 0.00 (-0.01, 0.00)   | 0.00 (-0.01, 0.00)   | 0.00 (-0.01, 0.00)   |
| Child Oppositional Aggressive Score                               | 0.29 (-0.15, 0.70)   | 0.29 (-0.15, 0.7)    | 0.29 (-0.15, 0.70)   | 0.29 (-0.15, 0.70)   | 0.29 (-0.15, 0.70)   |
| Parental Harsh Discipline, Warmth, & Appropriate Discipline Score | -0.02 (-0.26, 0.24)  | -0.02 (-0.26, 0.24)  | -0.02 (-0.26, 0.24)  | -0.02 (-0.26, 0.24)  | -0.02 (-0.26, 0.24)  |
| Child Social Competence - Parent Report                           | 0.05 (-0.06, 0.15)   | 0.05 (-0.06, 0.15)   | 0.05 (-0.06, 0.15)   | 0.05 (-0.06, 0.15)   | 0.05 (-0.06, 0.15)   |
| Child Woodcock-Johnson Word Identification Score                  | 0.01 (0.00, 0.03)    | 0.01 (0.00, 0.03)    | 0.01 (0.00, 0.03)    | 0.01 (0.00, 0.03)    | 0.01 (0.00, 0.03)    |
| Child Emotional Recognition                                       | 0.06 (0.04, 0.09)    | 0.06 (0.04, 0.09)    | 0.06 (0.04, 0.09)    | 0.06 (0.04, 0.09)    | 0.06 (0.04, 0.09)    |
| Parental Warmth                                                   | 0.01 (-0.07, 0.09)   | 0.01 (-0.07, 0.09)   | 0.01 (-0.07, 0.09)   | 0.01 (-0.07, 0.09)   | 0.01 (-0.07, 0.09)   |
| Child Competent Social Problem Solving Score                      | 0.86 (0.58, 1.16)    | 0.87 (0.58, 1.16)    | 0.86 (0.58, 1.15)    | 0.86 (0.58, 1.15)    | 0.86 (0.58, 1.15)    |
| Parental Neighborhood Satisfaction Score                          | -0.01 (-0.12, 0.10)  | -0.01 (-0.12, 0.10)  | -0.01 (-0.12, 0.10)  | -0.01 (-0.12, 0.10)  | -0.01 (-0.12, 0.10)  |
| Child Wechsler Intelligence Scale Average Vocab & Block Design    | 0.15 (0.06, 0.24)    | 0.15 (0.06, 0.24)    | 0.15 (0.06, 0.24)    | 0.15 (0.06, 0.24)    | 0.15 (0.06, 0.24)    |

**Academic Skills Gr1-Gr3 on**

**b (95% CI)                      b (95% CI)                      b (95% CI)                      b (95% CI)                      b (95% CI)**

|                                                                   |                      |                      |                      |                      |                     |
|-------------------------------------------------------------------|----------------------|----------------------|----------------------|----------------------|---------------------|
| Intervention                                                      | 0.12 (-0.02, 0.25)   | 0.12 (-0.02, 0.25)   | 0.12 (-0.02, 0.25)   | 0.12 (-0.02, 0.25)   | 0.19 (0.05, 0.34)   |
| Male                                                              | -0.14 (-0.27, -0.02) | -0.14 (-0.27, -0.02) | -0.14 (-0.27, -0.01) | -0.14 (-0.27, -0.02) | -0.13 (-0.28, 0.02) |
| Cohort 1                                                          | 0.05 (-0.11, 0.23)   | 0.05 (-0.11, 0.23)   | 0.05 (-0.11, 0.23)   | 0.05 (-0.12, 0.23)   | 0.02 (-0.16, 0.21)  |
| Cohort 2                                                          | -0.06 (-0.24, 0.11)  | -0.06 (-0.24, 0.11)  | -0.06 (-0.24, 0.11)  | -0.06 (-0.24, 0.11)  | 0.03 (-0.15, 0.22)  |
| Durham, NC                                                        | 0.04 (-0.24, 0.32)   | 0.04 (-0.24, 0.32)   | 0.04 (-0.24, 0.32)   | 0.04 (-0.24, 0.32)   | -0.08 (-0.36, 0.21) |
| Nashville, TN                                                     | 0.08 (-0.15, 0.34)   | 0.08 (-0.15, 0.34)   | 0.08 (-0.15, 0.34)   | 0.08 (-0.16, 0.34)   | -0.11 (-0.36, 0.15) |
| Seattle, WA                                                       | 0.02 (-0.20, 0.23)   | 0.02 (-0.20, 0.24)   | 0.02 (-0.2, 0.24)    | 0.02 (-0.20, 0.23)   | 0.12 (-0.1, 0.34)   |
| Black                                                             | -0.03 (-0.24, 0.17)  | -0.03 (-0.24, 0.17)  | -0.03 (-0.24, 0.17)  | -0.03 (-0.24, 0.17)  | -0.17 (-0.38, 0.03) |
| Initial Screen Score                                              | 0.00 (-0.01, 0.00)   | 0.00 (-0.01, 0.00)   | 0.00 (-0.01, 0.00)   | 0.00 (-0.01, 0.00)   | -0.01 (-0.02, 0.00) |
| Pre-Intervention Covariates                                       |                      |                      |                      |                      |                     |
| Parental Depression                                               | 0.00 (-0.01, 0.01)   | 0.00 (-0.01, 0.01)   | 0.00 (-0.01, 0.01)   | 0.00 (-0.01, 0.01)   |                     |
| Child Hostile Attribution                                         | 0.21 (-0.07, 0.50)   | 0.21 (-0.06, 0.5)    | 0.21 (-0.06, 0.5)    | 0.21 (-0.06, 0.5)    |                     |
| Child Aggressive Behavior                                         | 0.00 (-0.01, 0.01)   | 0.00 (-0.01, 0.01)   | 0.00 (-0.01, 0.01)   | 0.00 (-0.01, 0.01)   |                     |
| Child Emotional Appropriateness Score                             | 0.08 (0.00, 0.18)    | 0.08 (0.00, 0.18)    | 0.08 (0.00, 0.18)    | 0.08 (0.00, 0.18)    |                     |
| Parental Family Satisfaction                                      | 0.01 (-0.09, 0.11)   | 0.01 (-0.09, 0.11)   | 0.01 (-0.09, 0.11)   | 0.01 (-0.09, 0.11)   |                     |
| Parental Friendship Satisfaction                                  | 0.01 (-0.11, 0.12)   | 0.01 (-0.11, 0.12)   | 0.01 (-0.11, 0.12)   | 0.01 (-0.11, 0.12)   |                     |
| Parent-Report of Physical Punishment                              | 0.05 (-0.22, 0.32)   | 0.05 (-0.22, 0.32)   | 0.05 (-0.22, 0.32)   | 0.05 (-0.22, 0.32)   |                     |
| Parent-Report of Kindergarten Stress                              | -0.02 (-0.04, 0.00)  | -0.02 (-0.04, 0.00)  | -0.02 (-0.04, 0.00)  | -0.02 (-0.04, 0.00)  |                     |
| Parent-Report of Verbal Punishment                                | 0.12 (-0.07, 0.30)   | 0.12 (-0.07, 0.30)   | 0.12 (-0.07, 0.3.0)  | 0.12 (-0.07, 0.30)   |                     |
| Socioeconomic Status                                              | 0.00 (0.00, 0.01)    | 0.00 (0.00, 0.01)    | 0.00 (0.00, 0.01)    | 0.00 (0.00, 0.01)    |                     |
| Child Oppositional Aggressive Score                               | 0.10 (-0.27, 0.48)   | 0.10 (-0.27, 0.48)   | 0.1.0 (-0.27, 0.48)  | 0.10 (-0.27, 0.47)   |                     |
| Parental Harsh Discipline, Warmth, & Appropriate Discipline Score | 0.04 (-0.20, 0.28)   | 0.04 (-0.20, 0.29)   | 0.04 (-0.20, 0.28)   | 0.04 (-0.20, 0.28)   |                     |
| Child Social Competence - Parent Report                           | 0.03 (-0.09, 0.15)   | 0.03 (-0.09, 0.15)   | 0.03 (-0.09, 0.15)   | 0.03 (-0.09, 0.15)   |                     |
| Child Woodcock-Johnson Word Identification Score                  | 0.05 (0.04, 0.07)    | 0.05 (0.04, 0.07)    | 0.05 (0.04, 0.07)    | 0.05 (0.04, 0.07)    |                     |
| Child Emotional Recognition                                       | 0.06 (0.03, 0.09)    | 0.06 (0.03, 0.09)    | 0.06 (0.03, 0.09)    | 0.06 (0.03, 0.09)    |                     |
| Parental Warmth                                                   | -0.01 (-0.1, 0.08)   | -0.01 (-0.10, 0.08)  | -0.01 (-0.10, 0.08)  | -0.01 (-0.10, 0.08)  |                     |
| Child Competent Social Problem Solving Score                      | -0.02 (-0.32, 0.30)  | -0.02 (-0.32, 0.30)  | -0.02 (-0.32, 0.30)  | -0.02 (-0.32, 0.30)  |                     |
| Parental Neighborhood Satisfaction Score                          | -0.05 (-0.15, 0.05)  | -0.05 (-0.15, 0.05)  | -0.05 (-0.15, 0.05)  | -0.05 (-0.15, 0.05)  |                     |
| Child Wechsler Intelligence Scale Average Vocab & Block Design    | 0.20 (0.11, 0.29)    | 0.20 (0.11, 0.29)    | 0.20 (0.11, 0.29)    | 0.20 (0.11, 0.29)    |                     |



Table S5: FIML Results for Weekly Opioid Use excluding Pre-intervention Covariates except Initial Screen Score (N=891)

|                                              | Main Effects model | Moderation by Gender | Moderation by Race | Mediation            |
|----------------------------------------------|--------------------|----------------------|--------------------|----------------------|
|                                              | OR (95% CI)        | OR (95% CI)          | OR (95% CI)        | OR (95% CI)          |
| Intervention                                 | 0.39 (0.17, 0.94)  | 0.33 (0.04, 3.16)    | 0.26 (0.09, 0.80)  | 0.50 (0.14, 1.24)    |
| Intervention*Male                            |                    | 1.24 (0.10, 15.6)    |                    |                      |
| Intervention*Black                           |                    |                      | 3.15 (0.43, 23.1)  |                      |
| Interpersonal Skills Gr1-Gr8                 |                    |                      |                    | 0.67 (0.41, 1.09)    |
| Intrapersonal Skills Gr1-Gr5                 |                    |                      |                    | 0.80 (0.56, 1.15)    |
| Academic Skills Gr1-Gr3                      |                    |                      |                    | 1.07 (0.67, 2.23)    |
| Male                                         | 1.52 (0.52, 4.49)  | 1.44 (0.41, 5.13)    | 1.50 (0.50, 4.52)  | 1.27 (0.42, 6.99)    |
| Cohort 1                                     | 1.43 (0.41, 4.99)  | 1.42 (0.41, 4.99)    | 1.39 (0.39, 5.02)  | 1.34 (0.31, 11.2)    |
| Cohort 2                                     | 2.15 (0.71, 6.57)  | 2.14 (0.69, 6.63)    | 2.14 (0.68, 6.80)  | 2.15 (0.68, 16.0)    |
| Durham, NC                                   | 0.49 (0.05, 4.77)  | 0.49 (0.05, 4.85)    | 0.50 (0.05, 5.04)  | 0.48 (0.00, 5.24)    |
| Nashville, TN                                | 1.47 (0.37, 5.90)  | 1.47 (0.37, 5.95)    | 1.38 (0.34, 5.59)  | 1.14 (0.17, 4.91)    |
| Seattle, WA                                  | 0.31 (0.08, 1.28)  | 0.32 (0.08, 1.31)    | 0.31 (0.08, 1.26)  | 0.33 (0.00, 1.04)    |
| Black                                        | 0.58 (0.10, 3.45)  | 0.57 (0.09, 3.47)    | 0.38 (0.05, 3.16)  | 0.55 (0.05, 3.25)    |
| Initial Screen Score                         | 1.04 (1.00, 1.08)  | 1.04 (1.00, 1.08)    | 1.04 (1.00, 1.08)  | 1.03 (0.98, 1.07)    |
| <b>Indirect Intervention Effect through:</b> |                    |                      |                    |                      |
| Interpersonal Skills Gr1-Gr8                 |                    |                      |                    | 0.82 (0.63, 1.04)    |
| Intrapersonal Skills Gr1-Gr5                 |                    |                      |                    | 0.92 (0.79, 1.05)    |
| Academic Skills Gr1-Gr3                      |                    |                      |                    | 1.01 (0.92, 1.18)    |
| <b>Interpersonal Skills Gr1-Gr8 on</b>       |                    |                      |                    | <b>b (95% CI)</b>    |
| Intervention                                 |                    |                      |                    | 0.48 (0.34, 0.62)    |
| Male                                         |                    |                      |                    | -0.32 (-0.46, -0.18) |
| Cohort 1                                     |                    |                      |                    | -0.17 (-0.36, 0.04)  |
| Cohort 2                                     |                    |                      |                    | 0.02 (-0.17, 0.23)   |
| Durham, NC                                   |                    |                      |                    | 0.33 (0.07, 0.59)    |
| Nashville, TN                                |                    |                      |                    | -0.01 (-0.25, 0.25)  |
| Seattle, WA                                  |                    |                      |                    | -0.10 (-0.29, 0.09)  |
| Black                                        |                    |                      |                    | -0.38 (-0.55, -0.22) |
| Initial Screen Score                         |                    |                      |                    | -0.02 (-0.03, -0.01) |
| <b>Intrapersonal Skills Gr1-Gr5 on</b>       |                    |                      |                    |                      |

|                      |                      |
|----------------------|----------------------|
| Intervention         | 0.36 (0.23, 0.50)    |
| Male                 | -0.19 (-0.31, -0.06) |
| Cohort 1             | -0.16 (-0.32, 0.01)  |
| Cohort 2             | -0.04 (-0.19, 0.13)  |
| Durham, NC           | -0.24 (-0.48, 0.01)  |
| Nashville, TN        | -0.36 (-0.59, -0.13) |
| Seattle, WA          | 0.38 (0.19, 0.59)    |
| Black                | -0.26 (-0.41, -0.12) |
| Initial Screen Score | -0.01 (-0.01, 0.00)  |

**Academic Skills Gr1-Gr3 on**

|                      |                     |
|----------------------|---------------------|
| Intervention         | 0.19 (0.05, 0.34)   |
| Male                 | -0.13 (-0.28, 0.02) |
| Cohort 1             | 0.02 (-0.16, 0.21)  |
| Cohort 2             | 0.03 (-0.15, 0.22)  |
| Durham, NC           | -0.08 (-0.36, 0.21) |
| Nashville, TN        | -0.11 (-0.36, 0.15) |
| Seattle, WA          | 0.12 (-0.1, 0.34)   |
| Black                | -0.17 (-0.38, 0.03) |
| Initial Screen Score | -0.01 (-0.02, 0.00) |

---

1. The members of the Conduct Problems Prevention Research Group (CPPRG) are Karen L. Bierman, Department of Psychology, Pennsylvania State University; John D. Coie, Department of Psychology and Neuroscience, Duke University; Daniel M. Crowley, Department of Human Development and Family Studies, Pennsylvania State University; Kenneth A. Dodge, Department of Psychology and Neuroscience, Duke University; Mark T. Greenberg, Department of Human Development and Family Studies, Pennsylvania State University; John E. Lochman, Department of Psychology, The University of Alabama; Robert J. McMahon, Department of Psychology, Simon Fraser University, and the B.C. Children's Hospital Research Institute, Vancouver, British Columbia, Canada; and Ellen E. Pinderhughes, Eliot-Pearson Department of Child Study and Human Development, Tufts University.
